# Supplementary material for: An efficient method for genome-wide polyadenylation site mapping and RNA quantification
Source: PubMed Central journal article supplement — Nucleic Acids Res. 2013 Jan 7;41(5):e65. doi: 10.1093/nar/gks1249 (PMC3597643; doi:10.1093/nar/gks1249), 2013-01-07
Supplement: supp_gks1249_nar-02564-met-k-2012-File009.pdf [file supp_gks1249_nar-02564-met-k-2012-File009.pdf]

**Supplementary Table 3: Oligonucleotide sequences used in this study.**

| name/protocol     | oligo sequence                                                                                            | comment                                                |
|-------------------|-----------------------------------------------------------------------------------------------------------|--------------------------------------------------------|
| <b>3'T-fill</b>   |                                                                                                           |                                                        |
| BioP5_dT16VN      | [ Btn ] AATGATACGGCGACCACCGAGATCTACACTCTTTCCCTACACGACGCTCTTCCGATCTTTTTTTTTTTTTTTTTTVN                     | 1 <sup>st</sup> strand primer                          |
| P7_T1_for_Mpx_01  | CAAGCAGAAGACGGCATAACGAGATCGGTCTCGGCATTCCTGCTGAACCGCTCTTCCGATCTCGTGAT*T                                    | P7 adapter up                                          |
| P7_T1_for_Mpx_02  | CAAGCAGAAGACGGCATAACGAGATCGGTCTCGGCATTCCTGCTGAACCGCTCTTCCGATCTAAGCTA*T                                    | P7 adapter up                                          |
| P7_T1_for_Mpx_03  | CAAGCAGAAGACGGCATAACGAGATCGGTCTCGGCATTCCTGCTGAACCGCTCTTCCGATCTGTAGCC*T                                    | P7 adapter up                                          |
| P7_T1_for_Mpx_04  | CAAGCAGAAGACGGCATAACGAGATCGGTCTCGGCATTCCTGCTGAACCGCTCTTCCGATCTTACAAG*T                                    | P7 adapter up                                          |
| P7_T1_for_Mpx_05  | CAAGCAGAAGACGGCATAACGAGATCGGTCTCGGCATTCCTGCTGAACCGCTCTTCCGATCTACATCG*T                                    | P7 adapter up                                          |
| P7_T1_for_Mpx_06  | CAAGCAGAAGACGGCATAACGAGATCGGTCTCGGCATTCCTGCTGAACCGCTCTTCCGATCTGCCTAA*T                                    | P7 adapter up                                          |
| P7_T1_rev_Mpx_01  | [ Phos ] ATCACGAGATCGGAAGAGCGGTTTCAGCAGGAATGCCGAGACCGATCTCGTATGCCGTCTTCTGCTTG                             | P7 adapter down                                        |
| P7_T1_rev_Mpx_02  | [ Phos ] TAGCTTAGATCGGAAGAGCGGTTTCAGCAGGAATGCCGAGACCGATCTCGTATGCCGTCTTCTGCTTG                             | P7 adapter down                                        |
| P7_T1_rev_Mpx_03  | [ Phos ] GGCTACAGATCGGAAGAGCGGTTTCAGCAGGAATGCCGAGACCGATCTCGTATGCCGTCTTCTGCTTG                             | P7 adapter down                                        |
| P7_T1_rev_Mpx_04  | [ Phos ] CTTGTAAGATCGGAAGAGCGGTTTCAGCAGGAATGCCGAGACCGATCTCGTATGCCGTCTTCTGCTTG                             | P7 adapter down                                        |
| P7_T1_rev_Mpx_05  | [ Phos ] CGATGTAGATCGGAAGAGCGGTTTCAGCAGGAATGCCGAGACCGATCTCGTATGCCGTCTTCTGCTTG                             | P7 adapter down                                        |
| P7_T1_rev_Mpx_06  | [ Phos ] TTAGGCAGATCGGAAGAGCGGTTTCAGCAGGAATGCCGAGACCGATCTCGTATGCCGTCTTCTGCTTG                             | P7 adapter down                                        |
| <b>3'Internal</b> |                                                                                                           |                                                        |
| P7_Gsul_dT16      | [ Btn ] TGC GGCCGCAAGCAGAAGACGGCATAACGAGATCGGTCTCGGCATTCCTGCTGAACCGCTCTTCCGATCTGGAGTTT<br>TTTTTTTTTTTTTVN | 1 <sup>st</sup> strand primer                          |
| BioP7_dT16VN      | CAAGCAGAAGACGGCATAACGAGATCGGTCTCGGCATTCCTGCTGAACCGCTCTTCCGATCTTTTTTTTTTTTTTTTTTVN                         |                                                        |
| P5_T1_for_Mpx_01  | AATGATACGGCGACCACCGAGATCTACACTCTTTCCCTACACGACGCTCTTCCGATCTTACAAGT                                         | P5 adapter up                                          |
| P5_T1_for_Mpx_02  | AATGATACGGCGACCACCGAGATCTACACTCTTTCCCTACACGACGCTCTTCCGATCTACATCGT                                         | P5 adapter up                                          |
| P5_T1_for_Mpx_03  | AATGATACGGCGACCACCGAGATCTACACTCTTTCCCTACACGACGCTCTTCCGATCTGCCTAAT                                         | P5 adapter up                                          |
| P5_T1_rev_Mpx_01  | CTTGTAAGATCGGAAGAGCGTCTGTAGGGAAAGAGTGTAGATCTCGGTGGTCGCCGTATCATT                                           | P5 adapter down                                        |
| P5_T1_rev_Mpx_02  | CGATGTAGATCGGAAGAGCGTCTGTAGGGAAAGAGTGTAGATCTCGGTGGTCGCCGTATCATT                                           | P5 adapter down                                        |
| P5_T1_rev_Mpx_03  | TTAGGCAGATCGGAAGAGCGTCTGTAGGGAAAGAGTGTAGATCTCGGTGGTCGCCGTATCATT                                           | P5 adapter down                                        |
| <b>3'Bpml</b>     |                                                                                                           |                                                        |
| P7_Gsul_dT16      | [ Btn ] TGC GGCCGCAAGCAGAAGACGGCATAACGAGATCGGTCTCGGCATTCCTGCTGAACCGCTCTTCCGATCTGGAGTTT<br>TTTTTTTTTTTTTVN | 1 <sup>st</sup> strand primer<br>with <i>Bpml</i> side |
| P7T1-F            | CAAGCAGAAGACGGCATAACGAGATCGGTCTCGGCATTCCTGCTGAACCGCTCTTCCGATCTT                                           | P7 adapter up                                          |
| P7-Rev            | [ Phos ] AGATCGGAAGAGCGGTTTCAGCAGGAATGCCGAGACCGATCTCGTATGCCGTCTTCTGCTTG [ AmC7 ]                          | P7 adapter down                                        |

P5\_MpxTT-F1  
P5\_MpxTT-F2  
P5\_MpxTT-F3  
P5\_MpxTT-R1  
P5\_MpxTT-R2  
P5\_MpxTT-R3

AATGATACGGCGACCACCGAGATCTACACTCTTTCCCTACACGACGCTCTTCCGATCTCGTGATTT  
AATGATACGGCGACCACCGAGATCTACACTCTTTCCCTACACGACGCTCTTCCGATCTAAGCTATT  
AATGATACGGCGACCACCGAGATCTACACTCTTTCCCTACACGACGCTCTTCCGATCTGTAGCCTT  
[ Phos ] ATCACGAGATCGGAAGAGCGTCGTGTAGGGAAAGAGTGTAGATCTCGGTGGTCGCCGTATCATT [ AmC7 ]  
[ Phos ] TAGCTTAGATCGGAAGAGCGTCGTGTAGGGAAAGAGTGTAGATCTCGGTGGTCGCCGTATCATT [ AmC7 ]  
[ Phos ] GGCTACAGATCGGAAGAGCGTCGTGTAGGGAAAGAGTGTAGATCTCGGTGGTCGCCGTATCATT [ AmC7 ]

P5 adapter up  
P5 adapter up  
P5 adapter up  
P5 adapter down  
P5 adapter down  
P5 adapter down

**RNAseq**

mp25PE2  
mp40PE2  
mp11PE2  
mp25PE1  
mp40PE1  
mp11PE1

ACACTCTTTCCCTACACGACGCTCTTCCGATCTTCCGTC\*T  
ACACTCTTTCCCTACACGACGCTCTTCCGATCTGAAATGA\*T  
ACACTCTTTCCCTACACGACGCTCTTCCGATCTTATAGAT\*T  
[ Phos ] GACGGAAGATCGGAAGAGCGGTTTCAGCAGGAATGCCGAG  
[ Phos ] TCATTTCAGATCGGAAGAGCGGTTTCAGCAGGAATGCCGAG  
[ Phos ] ATCTATAGATCGGAAGAGCGGTTTCAGCAGGAATGCCGAG

PE adapter up  
PE adapter up  
PE adapter up  
PE adapter down  
PE adapter down  
PE adapter down

6 nt barcodes are underlined  
[Btn] biotinylated nucleotide  
[AmC7] 3'Amine C7  
[Phos] 5'Phosphorylation  
\* s-linkage between the two bases
